# Supplementary material for: Overexpression of a Mitogen-Activated Protein Kinase SlMAPK3 Positively Regulates Tomato Tolerance to Cadmium and Drought Stress
Source: PubMed Central journal article supplement (PMC6385007; doi:10.3390/molecules24030556), 2019-02-03
Supplement: molecules-24-00556-s001.pdf [file molecules-24-00556-s001.pdf]

**Table S1.** The protein sequence information used for phylogenetic tree construction and proteins domain

| <b>Gene Name</b>  | <b>Solgenomics accession ID</b> | <b>Gene accession No.</b> | <b>Protein ID</b> |
|-------------------|---------------------------------|---------------------------|-------------------|
| <i>SIMPK1</i>     | Solyc12g019460.2                | NM_001247082.2            | NP_001234011.2    |
| <i>SIMPK2</i>     | Solyc08g014420.3                | NM_001247426.1            | NP_001234355.1    |
| <i>SIMPK3</i>     | Solyc06g005170.3                | NM_001247431.2            | NP_001234360.1    |
| <i>SIMAPK4</i>    | Solyc11g072630.2                | HM367593.1                | ADK38705.1        |
| <i>SIMAPK5</i>    | Solyc01g094960.3                | HM036493.2                | ADH43227.2        |
| <i>SIMAPK6</i>    | Solyc05g049970.3                | JF791807.1                | AEH42637.1        |
| <i>SIMAPK7</i>    | Solyc08g081490.2                | JF791808.1                | AEH42638.1        |
| <i>SIMAPK8</i>    | Solyc02g084870.3                | HM189670.1                | ADJ95343.1        |
| <i>SIMAPK9</i>    | Solyc04g080730.3                | HM245320.1                | ADK13095.1        |
| <i>SIMAPK10</i>   | Solyc10g007500.3                | JF795445.1                | AEH42667.1        |
| <i>SIMAPK11</i> , | Solyc07g062080.3                | JF795446.1                | AEH42668.1        |
| <i>SIMAPK12</i>   | Solyc07g056350.3                | JF795447.1                | AEH42669.1        |
| <i>SIMAPK13</i>   | Solyc01g080240.3                | JF795448.1                | AEH42670.1        |
| <i>SIMAPK14</i>   | Solyc04g007710.3                | JF795449.1                | AEH42671.1        |
| <i>SIMAPK15</i>   | Solyc05g008020.3                | JF795451.1                | AEH42673.1        |
| <i>SIMAPK16</i>   | Solyc12g040680.2                | JF795450.1                | AEH42672.1        |

**Table S2.** Primers used in the study

| Genes           | Primer sequences (5'-3')       |                                    |
|-----------------|--------------------------------|------------------------------------|
|                 | Forward                        | Reverse                            |
| <i>SIMPK3</i>   | CGGGATCCATGGTTGATGCTAATATGGGTG | GGCGCGAGCTCTTAAGCATATTCAGGATTCAACG |
| <i>NPTII</i>    | TTCATGCTGGAGTTCTTCGC           | GTCACCGACTTGAGCCATTG               |
| <i>qSIMPK3</i>  | CTCATCCCTACCTCGCAAAG           | TCAGGATTCAACGCCAAAGC               |
| <i>qSISOD</i>   | ACTTGCTCCTGGACTTCACG           | TCGGCATTGGCCACTATGTT               |
| <i>qSIPOD</i>   | GGAATGTGCCAACTGGTAGA           | TGATGAGCAACGAGACTC                 |
| <i>qSICAT</i>   | TGGAAGCCAACCTGTGGTGT           | ACTGGGATCAACGGCAAGAG               |
| <i>qSIAPX</i>   | TGTGAGCGAGGAGTACCTCA           | TGTGCTAGCTCCGCTTTGAA               |
| <i>qSlActin</i> | TGGTCGGAATGGGACAGAAG           | CTCAGTCAGGAGAACAGGGT               |

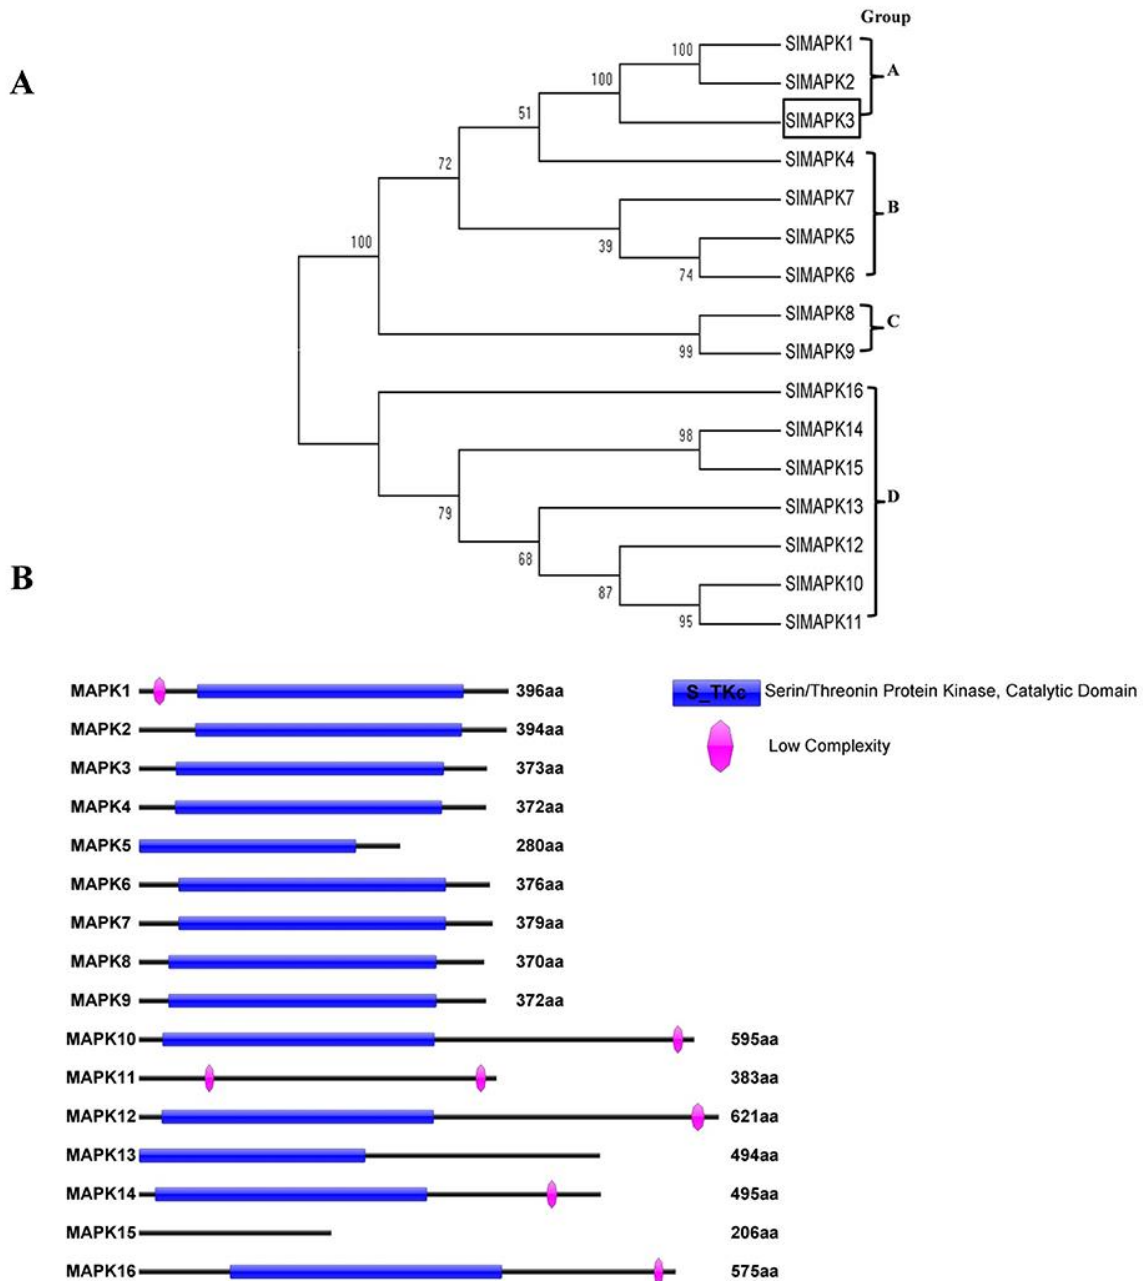

**Figure S1.** Phylogenetic and structural analysis based on the amino acid sequences of *Solanum lycopersicum* SIMAPKs. (A) Phylogenetic tree, the tree was generated using MEGA5 program by the neighbor-joining method. Bootstrap supports from 1000 replicates are indicated at each branch and (B) Domain position of SIMAPKs in tomato. Domains are indicated as boxes in different colors.

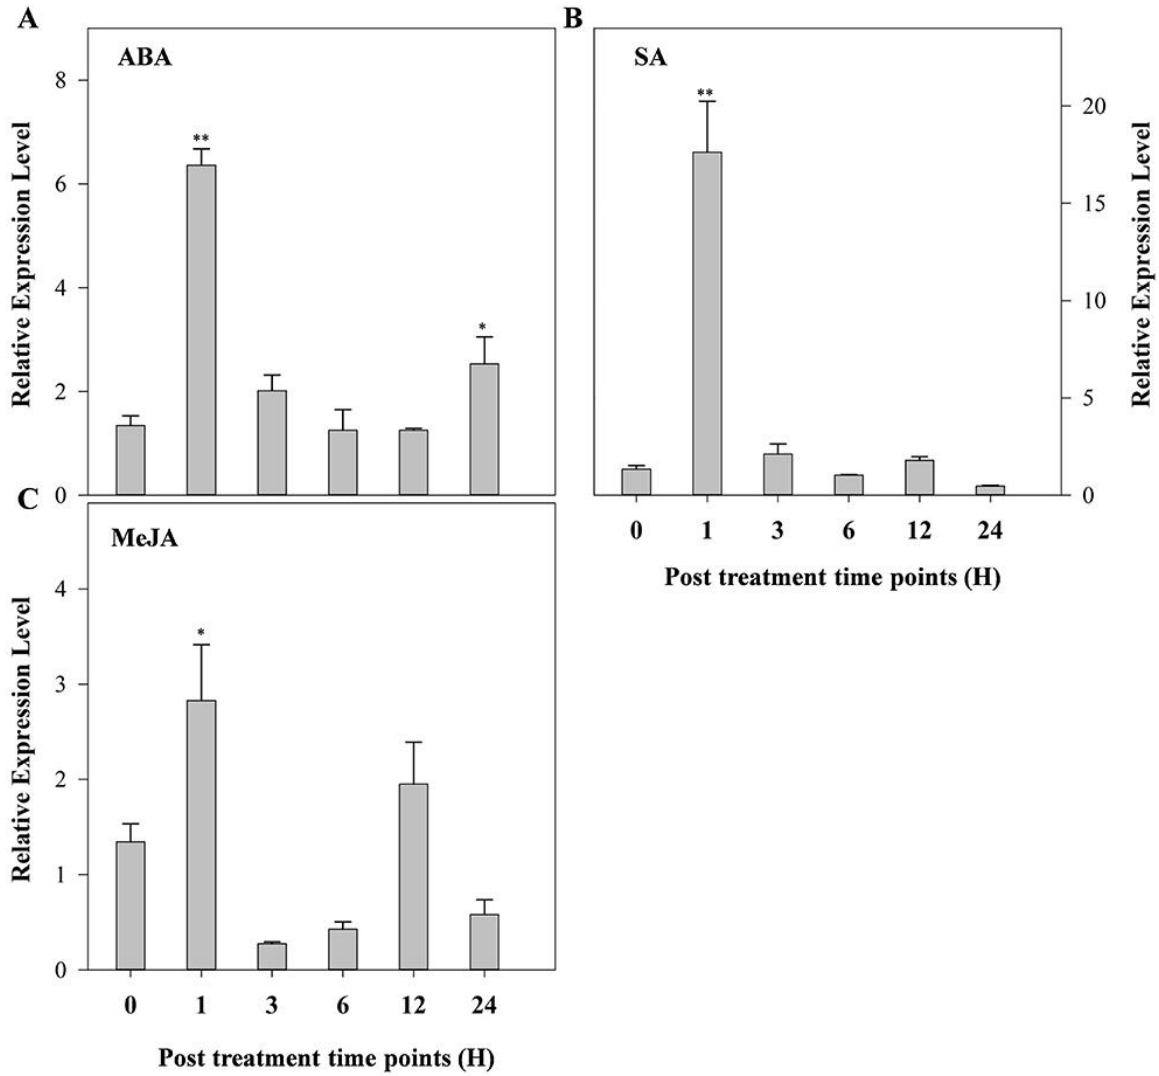

**Figure S2.** Expression patterns of *SIMAPK3* after different hormonal treatments. Expression patterns of *SIMAPK3* gene under different exogenous hormones. (A) ABA -100  $\mu$ M, (B) SA -100  $\mu$ M and (C) MeJA -100  $\mu$ M for 0, 1, 3, 6, 12, and 24h. Zero (0) represents seedlings without any treatment. The tomato actin gene was used as the internal control for normalization. Data represent mean  $\pm$ SE of three biological replicates.

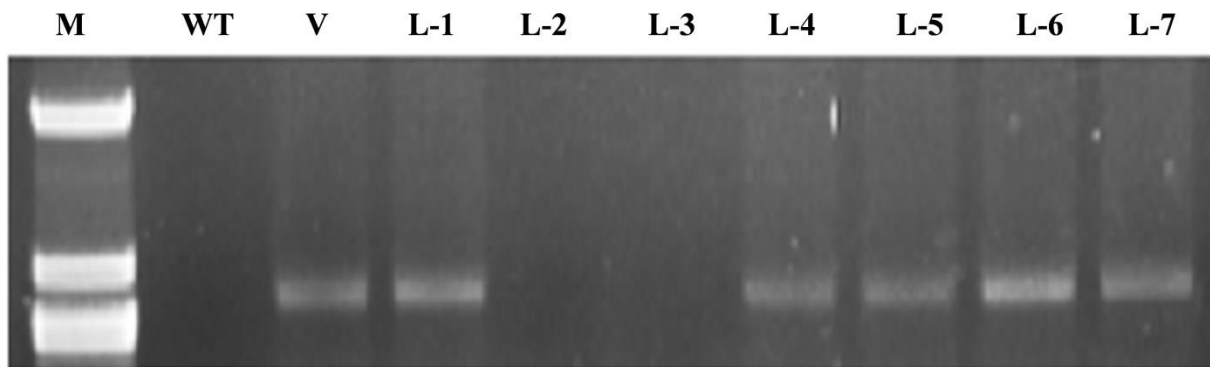

**Figure S3.** Confirmation of transgenic plants. PCR detection of NPTII fragments in T<sub>0</sub> transgenic plants. M: DNA marker, WT: Wild-type plants, V: pVBG2307-MPK3 vector and L1~7: 7 lines of T<sub>0</sub> transgenic plants.
